# Supplementary material
Source: PubMed Central journal article supplement (PMC3169656)
Supplement: supp_bhq296_Suppl_Table.pdf [file supp_bhq296_Suppl_Table.pdf]

| Publication             | Demographics:                                |                  |                                                                            |                                                |                                              |                 |                                                                            |                          | Conditions:                                                       |               |               | Acquisition:              |                          |                       | Preprocessing:                                             |                            |                      |                              | Seed:              |                                   | Field of view:                                   |                                                                          | Statistics:                                                      |                                                                       | Findings:       |                                        |                                                                                                                                        |                                                                                                 |
|-------------------------|----------------------------------------------|------------------|----------------------------------------------------------------------------|------------------------------------------------|----------------------------------------------|-----------------|----------------------------------------------------------------------------|--------------------------|-------------------------------------------------------------------|---------------|---------------|---------------------------|--------------------------|-----------------------|------------------------------------------------------------|----------------------------|----------------------|------------------------------|--------------------|-----------------------------------|--------------------------------------------------|--------------------------------------------------------------------------|------------------------------------------------------------------|-----------------------------------------------------------------------|-----------------|----------------------------------------|----------------------------------------------------------------------------------------------------------------------------------------|-------------------------------------------------------------------------------------------------|
|                         | Groups:                                      |                  |                                                                            |                                                |                                              |                 |                                                                            |                          | Task                                                              | Control       | Design        | TR (sec.)                 | Voxel size (mm)          | Number of time points | Detected Head motion                                       | Head motion regressed out? | Band pass filter     | Global signal regressed out? | Task regressed out | Derived from activation, anatomy? | Vol. $\mu$ l (or radius)                         | ROIs                                                                     | Whole brain?                                                     | Type                                                                  | r-z' conversion | Negative correlations?                 | TD > ASD                                                                                                                               | ASD > TD                                                                                        |
| n                       | Age                                          | IQ               | Diagnosis                                                                  | n                                              | Age                                          | IQ              | Group Matching                                                             |                          |                                                                   |               |               |                           |                          |                       |                                                            |                            |                      |                              |                    |                                   |                                                  |                                                                          |                                                                  |                                                                       |                 |                                        |                                                                                                                                        |                                                                                                 |
| Agam et al. 2010        | 11 (2F)                                      | 28 $\pm$ 10      | VIQ: 124 $\pm$ 12; NVIQ: 120 $\pm$ 10                                      | ADI-R, ADOS (7 HFA, 2 ASP, 2 PDD-NOS)          | 14 (6F)                                      | 27 $\pm$ 8      | VIQ: 114 $\pm$ 9                                                           | mAGE, mGEN, Estimate VIQ | Visual Saccade                                                    | Fixation      | Event-related | 2                         | 3.13x3.13x5              | 211                   | ns                                                         | yes                        | BP (0.009 Hz-.08 Hz) | ns                           | no                 | anat + aCOMB                      | ns                                               | Each seed region and all other voxels in the brain                       | yes                                                              | SSL: corr; GL: t-test on smoothed z-scores                            | yes             | ns                                     | dACC-Frontal eye field (FEF)                                                                                                           | Significant effects in L prefrontal and pericentral cortex (shown in Fig. 5, but not discussed) |
| Anderson et al., 2010   | 53 (4LH)                                     | 22.4 $\pm$ 7.2   | VIQ: 101.3 $\pm$ 21.1; NVIQ: 101.3 $\pm$ 16.5                              | ADOS, ADI-R, DSM-IV (49 AUT; 1 ASP; 3 PDD NOS) | 39 (2 AMB; 1 LH)                             | 21.1 $\pm$ 6.5  | VIQ: 116.0 $\pm$ 14.8; NVIQ: 114.2 $\pm$ 13.9                              | mAGE                     | n/a: Rest                                                         | n/a           | n/a           | 2                         | 3 x ns x ns              | 240                   | ns                                                         | ns                         | .001 Hz-.1 Hz        | no                           | n/a                | anat                              | single voxel                                     | Each voxel and 1 homotopic voxel in opposite hemisphere for entire brain | no: only 1 homotopic voxel for each single-voxel seed            | SSL: Corr; GL: t-test on smoothed z-scores, GLM with covariates       | yes             | ns; but seem to be apparent in Fig. 5C | Total interhemispheric connectivity; Interhemispheric correlations for sensorimotor cortex, frontal insula, and superior parietal lobe | None                                                                                            |
| Assaf et al., 2010      | 15                                           | 15.7 $\pm$ 3.0   | FSIQ: 119 $\pm$ 15.0                                                       | ADOS, ADI-R                                    | 15                                           | 17.1 $\pm$ 3.6  | FSIQ: 117.1 $\pm$ 16.9                                                     | mAGE, mFSIQ, mGEN        | n/a: Rest                                                         | n/a           | n/a           | 1.5                       | 3.4 x 3.4 x 5            | 210                   | Average in x, y, z direction is 3.2mm; no group difference | Excluded motion components | n/a                  | n/a                          | n/a                | aCOMB                             | n/a                                              | DMN components only                                                      | no: fc measures analyzed only for DMN components                 | SSL: ICA, Z-score spatial maps from GL-derived components; GL: t-test | n/a             | ns                                     | Precuneus, ACG                                                                                                                         | None                                                                                            |
| Bird et al., 2006       | 16                                           | 33.3 $\pm$ 11.5  | FSIQ: 119 $\pm$ 14                                                         | ADOS, ASQ; 1 AUT, 15 ASP                       | 16                                           | 35.3 $\pm$ 12.1 | FSIQ: 119 $\pm$ 13.2                                                       | mAGE, mFSIQ, mGEN        | Selective attention                                               | Fixation      | Event-related | 2.97                      | ns x ns x 3.75           | 627                   | ns                                                         | ns                         | HP (.01 Hz)          | ns                           | ns                 | aCOMB                             | rad=6mm                                          | FFA, PHG, FG, LH V1                                                      | no                                                               | SSL: DCM; GL: ANOVA                                                   | ns              | ns                                     | Attentional modulation: V1 $\Leftrightarrow$ Face selection region; House selective ROI $\Rightarrow$ V1                               | None                                                                                            |
| Brieber et al., 2010    | 15 (1LH); only 14 included in fcMRI analysis | 16.42 $\pm$ 2.28 | FSIQ: 108.53 $\pm$ 15.34; VIQ: 114.07 $\pm$ 16.69; NVIQ: 101.2 $\pm$ 12.43 | ADOS, ADI (13 ASP; 2 HFA)                      | 15 (2LH); only 14 included in fcMRI analysis | 15.35 $\pm$ 1.8 | FSIQ: 115.07 $\pm$ 11.62; VIQ: 115.07 $\pm$ 12.79; NVIQ: 112.13 $\pm$ 9.45 | mAGE, mFSIQ, mVIQ        | Coherent motion task                                              | Jittered Null | Event-related | 3                         | 4 x 3.1 x 3.1 (0.4m gap) | 230                   | ns                                                         | ns                         | HP                   | no                           | no                 | aCOMB                             | ns; at least 3 active voxels                     | 4 ROIs aCOMB                                                             | no                                                               | SSL: Corr; GL: z-test on z-scores                                     | yes             | ns                                     | None                                                                                                                                   | None                                                                                            |
| Cherkassky et al., 2006 | 57 (4F; 7 LH)                                | 24 $\pm$ 10.6    | FSIQ: 106 $\pm$ 16.2; VIQ: 104 $\pm$ 16.1                                  | ADOS-G, ADI-R; HFA                             | 57 (5F; 4LH)                                 | 24 $\pm$ 9.0    | FSIQ: 113 $\pm$ 11.3; VIQ: 108 $\pm$ 10.5                                  | mAGE, mFSIQ, mVIQ        | 6 fMRI studies: TOL, language-related, response inhibition, & TOM | Rest          | Block         | TOL: 3.125 x 3; 3.125 x 5 | ns                       | ns                    | HP (.01 Hz-.004 Hz)                                        | ns                         | no                   | no                           | aCOMB              | rad=6mm                           | 12 ROIs aCOMB (time series averaged within ROIs) | no                                                                       | SSL: Corr (repeated subs); GL: Compared in a random-effects mode | yes                                                                   | ns              | 94% ROI pairs (DMN regions)            | ns                                                                                                                                     |                                                                                                 |

|                      |                      |                                                        |                                                        |                                   |             |                                                        |                                                      |                                |                               |                                 |       |                             |                   |     |                                                                          |               |                |                        |                                                                        |                   |               |                                                           |                                                    |                                                                                                            |     |            |                                             |                                                                              |      |
|----------------------|----------------------|--------------------------------------------------------|--------------------------------------------------------|-----------------------------------|-------------|--------------------------------------------------------|------------------------------------------------------|--------------------------------|-------------------------------|---------------------------------|-------|-----------------------------|-------------------|-----|--------------------------------------------------------------------------|---------------|----------------|------------------------|------------------------------------------------------------------------|-------------------|---------------|-----------------------------------------------------------|----------------------------------------------------|------------------------------------------------------------------------------------------------------------|-----|------------|---------------------------------------------|------------------------------------------------------------------------------|------|
| Damarla et al., 2010 | 13 (2F; 19 ±5.5 1LH) | FSIQ: 109.5 ±8.7; VIQ: 107.7 ±9.03; NVIQ: 109.5 ± 11.4 | ADOS, ADI                                              | 13 (1LH)                          | 22.1 ± 4.25 | FSIQ: 111.5 ±5.75; VIQ: 109.8 ±6.75; NVIQ: 110.5 ±5.96 | mAGE, mIQ, mSES                                      | Embedded figures task          | Fixation                      | Block                           | 1     | 5 x 3.125 x 3.125 (1mm gap) | 144               | ns  | ns                                                                       | ns            | ns             | no                     | aCOMB                                                                  | ns                | 12 ROIs aCOMB | no                                                        | SSL: Corr; GL: ANOVA on z-scores, post-hoc t-tests | yes                                                                                                        | ns  | ns         | Frontal-Posterior                           | None                                                                         |      |
| Ebisch et al., 2010  | 14 (4F)              | 15.79 ±1.93                                            | FSIQ: 106.5 ±20.01                                     | ADI-R, DSM IV; HFA, 10 ASD, 4 ASP | 15 (2F)     | 15.95 ±1.65                                            | FSIQ: 104.9 ±8.45                                    | mAGE, mFSIQ, mGEN, mHAND       | n/a: Rest                     | n/a                             | n/a   | 1.99                        | 3.5 x 3.5 x ns    | ns  | Pts with "excessive motion" excluded; no group differences               | yes           | .009 Hz-.08 Hz | yes                    | ns                                                                     | aTD (litTD) + aTD | rad= 6mm      | RH aIC, LH aIC, RH pIC, LH pIC                            | yes                                                | SSL: Corr; GL: t-test (seed based connectivity) SSL: Cross Corr Matrix; GL: t-test (ROI-based fc analyses) | yes | ns         | ns                                          | posterior insular cortices and somatosensory cortices including the amygdala | ns   |
| Jones et al., 2010   | 16                   | 16.1 ±2.6                                              | FSIQ: 117.5 ±16.4                                      | ADOS, ADI-R; ASD                  | 20          | 17.1 ±2.1                                              | FSIQ: 114.0 ±9.0                                     | mAGE, mFSIQ                    | Verbal fluency                | Months (over-learned); Rest     | Block | 2                           | 3.8 x 3.8 x 5     | 920 | ns per group; TPs with SSD>1 censored; pts with >25% data loss discarded | yes (in M2-3) | LP (.1Hz)      | M1-3: no; M3+ GSR: yes | M1 = no; M2 = only 1 regr for all 4 tasks cond.; M3 = 4 separate regrs | aCOMB + aTD       | ns            | 17 ROIs aCOMB + 3TPN + time series averaged w/in each ROI | ns                                                 | SSL: Regression ; GL: t-test on z'                                                                         | yes | Obs & Incl | M1 = 10 ROI pairs; M2 = 5; M3=3; M3+GSR = 2 | M3 + GSR: 5 marginal                                                         |      |
| Just et al., 2004    | 17 (3LH)             | ns                                                     | ns                                                     | ADOS, ADI; HFA                    | 17 (1LH)    | ns                                                     | ns                                                   | mAGE, mFSIQ, mGEN, mRACE, mSES | Sentence comprehension        | None: Only task blocks analyzed | Block | 3                           | 3.125 x 3.125 x 5 | ns  | <.7mm                                                                    | ns            | ns             | ns                     | no                                                                     | aTD (litTD)       | 35 µl         | 35 ROIs anat (presumed activation)                        | no                                                 | SSL: Corr; GL: Repeated measures ANOVA                                                                     | yes | ns         | ns                                          | 10/186 ROI pairs                                                             | None |
| Just et al., 2007    | 18                   | 27.1 ±11.9                                             | FSIQ: 109.3 ±17.7; VIQ: 112.2 ±17.0                    | ADOS, ADI                         | 18          | 24.5 ±9.9                                              | FSIQ: 108.1 ±13.8; VIQ: 107.9 ±10.9                  | mAGE, mFSIQ, mGEN              | TOL                           | Fixation                        | Block | 3                           | 3.125 x 3.125 x 5 | ns  | ns                                                                       | ns            | LP             | ns                     | no                                                                     | aCOMB             | rad= 10; 12mm | 15 ROIs aCOMB                                             | no                                                 | SSL: Corr; GL: ANOVA on averaged z' pairs and factor analysis                                              | yes | ns         | ns                                          | Frontal-Parietal                                                             | ns   |
| Kana et al., 2006    | 12 (2F; 1LH)         | 22.5 ±8.8                                              | FSIQ: 110.7 ±9.2; VIQ: 109.7 ±10.8                     | ADOS, ADI                         | 13 (1LH)    | 20.3 ±4.0                                              | FSIQ: 113.2 ±9.2; VIQ: 109.4 ±10.5                   | mAGE, mFSIQ, mGEN, mHAND, mVIQ | Sentence processing (Imagery) | None: Only task blocks analyzed | Block | 1                           | 3.125 x 3.125 x 5 | ns  | Pts with "excessive motion" excluded                                     | ns            | LP             | ns                     | no                                                                     | aCOMB             | rad= 5-10mm   | 21 ROIs aCOMB                                             | no                                                 | SSL: Corr; GL: ANOVA on averaged z' pairs for inter- and intra-lobe networks                               | yes | ns         | ns                                          | Frontal-Parietal                                                             | None |
| Kana et al., 2007    | 12                   | 26.8 ±7.7                                              | FSIQ: 110.1 ±12.6; VIQ: 110.1 ±14.4; NVIQ: 107.1 ±13.8 | ADOS, ADI                         | 12          | 22.5 ±3.2                                              | FSIQ: 117.0 ±8.7; VIQ: 114.0 ±10.0; NVIQ: 116.9 ±6.4 | mAGE, mFSIQ, mGEN, mHAND       | Go/No-Go                      | Fixation                        | Block | 1                           | 3.125 x 3.125 x 5 | ns  | ns                                                                       | ns            | LP             | ns                     | no                                                                     | aCOMB             | rad= 5-10mm   | 21 ROIs aCOMB                                             | no                                                 | SSL: Corr; GL: ANOVAs and t-tests on z' pairs between "network" seeds and individual ROIs                  | yes | ns         | ns                                          | Inhibition network (CG + INS); RIFG; IPL                                     | ns   |

|                                         |                                    |                |                                                                                                                  |                                                            |                              |                |                                                                                |                                            |                                  |          |       |     |                                         |     |                                                                                         |                                                                                          |                  |          |    |       |                 |                            |     |                                                                                                              |     |      |                                                                                                    |                                          |
|-----------------------------------------|------------------------------------|----------------|------------------------------------------------------------------------------------------------------------------|------------------------------------------------------------|------------------------------|----------------|--------------------------------------------------------------------------------|--------------------------------------------|----------------------------------|----------|-------|-----|-----------------------------------------|-----|-----------------------------------------------------------------------------------------|------------------------------------------------------------------------------------------|------------------|----------|----|-------|-----------------|----------------------------|-----|--------------------------------------------------------------------------------------------------------------|-----|------|----------------------------------------------------------------------------------------------------|------------------------------------------|
| Kana et al., 2009                       | 12                                 | 24.6<br>±6.9   | FSIQ:<br>104.3<br>±14.4;<br>VIQ:<br>104.1<br>±14.4;<br>NVIQ:<br>102.8<br>±13.6                                   | ADOS-G,<br>ADI-R; HFA                                      | 12                           | 24.4<br>±3.7   | FSIQ:<br>114.3<br>±8.6;<br>VIQ:<br>110.6<br>±9.9;<br>NVIQ:<br>115.2<br>±7.4    | mAGE,<br>mFSIQ,<br>mGEN,<br>mRACE,<br>mSES | TOM                              | Fixation | Block | 1   | 3.125 x<br>3.125 x<br>5                 | ns  | Pts with<br>"excessive<br>motion"<br>excluded                                           | ns                                                                                       | HP               | GIS      | no | aCOMB | rad= 4-<br>8mm  | 15 ROIs<br>aCOMB           | no  | SSL: Corr;<br>GL: t-test,<br>mixed ANOVA                                                                     | yes | ns   | Within TOM<br>network for TOM<br>and Random<br>conditions;<br>between fronto-<br>parietal ROIs     | ns                                       |
| Kennedy<br>and Cour-<br>chesne,<br>2008 | 12                                 | 26.5<br>±12.8  | FSIQ:<br>101.6<br>±15.2;<br>VIQ: 97.2<br>±18.4;<br>NVIQ:<br>105.3<br>±14.9;                                      | ADOS, ADI;<br>6 AUT, 6<br>ASP                              | 12                           | 27.5<br>±10.9  | FSIQ:<br>111.5<br>±8.3;<br>VIQ:<br>105.6<br>±4.5;<br>NVIQ:<br>115.7<br>±12.7   | mAGE,<br>mFSIQ,<br>mGEN,<br>mNVIQ,<br>mVIQ | n/a: Rest                        | n/a      | n/a   | 2   | 3.44 x<br>3.44 x<br>4                   | 210 | TPs with<br>SSD >0.3<br>removed.<br>Pts with<br>>20% TPs<br>removed<br>were<br>excluded | yes<br>(Temporal<br>derivat-ives<br>of motion<br>output also<br>used as re-<br>gressors) | .01 Hz-<br>.1 Hz | GIS; GSR | ns | aTD   | ns              | 7TPN,<br>6TNN<br>ROIs, aTD | no  | SSL: Corr;<br>GL: ANOVA<br>on z-scores,<br>post-hoc t-<br>tests                                              | yes | Incl | Within TNN in<br>MPFC and LAG                                                                      | None                                     |
| Kleinhans et<br>al., 2008               | 19                                 | 23.5<br>±7.8   | FSIQ:<br>106.7<br>±15.7 (85-<br>139); VIQ:<br>106.8<br>±15.9 (76-<br>140);<br>NVIQ:<br>105<br>±16.2 (83-<br>133) | ADOS, ADI;<br>8 AUT, 9<br>ASP, 2 PDD-<br>139); VIQ:<br>NOS | 21                           | 25.1<br>±7.6   | FSIQ:<br>109.1<br>±14.4;<br>VIQ:<br>107.5<br>±13.6;<br>NVIQ:<br>108.5<br>±17.1 | mAGE,<br>mFSIQ,<br>mNVIQ,<br>mVIQ          | Face, house<br>working<br>memory | Fixation | Block | 3   | ns x ns<br>x 6<br>(1mm<br>gap)          | 112 | Pts with<br>"excessive<br>motion"<br>excluded                                           | yes                                                                                      | HP (.01<br>Hz)   | ns       | ns | aCOMB | ns              | no                         | yes | SSL:<br>Psychophysiol<br>ogical<br>interaction;<br>GL: t-test on<br>output from<br>mixed-effects<br>analysis | ns  | no   | PCG (incl. LCu);<br>LAMY, Thal                                                                     | None                                     |
| Koshino et<br>al., 2005                 | 14                                 | 25.7           | FSIQ:<br>100.1;<br>VIQ:<br>102.6                                                                                 | ADOS, ADI                                                  | 14                           | 29.8           | FSIQ:<br>109.1,<br>VIQ:10<br>8.3                                               | mAGE,<br>mFSIQ,<br>mGEN,<br>mVIQ           | N-back                           | Fixation | Block | 1   | 3.125 x<br>3.125 x<br>5                 | ns  | ns                                                                                      | ns                                                                                       | ns               | ns       | no | anat  | ns              | c. 20 ROIs<br>anat         | no  | SSL: Corr;<br>GL: t-tests<br>used to<br>compare z'<br>values<br>between ROI<br>pairs                         | yes | ns   | L IPL <=> R<br>DLPFC, R FEF,<br>R post PreCS,<br>bilateral IPS, R<br>SPL; L IPS <=><br>supParaCing | L DLPFC & R<br>inferior<br>temporal lobe |
| Koshino et<br>al., 2008                 | 11                                 | 24.5<br>±10.2  | FSIQ:<br>104.5<br>±13.1;<br>VIQ:<br>106.1<br>±14.1;<br>NVIQ:<br>102.1<br>±13.8                                   | ADOS, ADI                                                  | 11                           | 28.7<br>±10.9  | FSIQ:<br>108.6<br>±9.1;<br>VIQ:<br>108.0<br>±8.6;<br>NVIQ:<br>108.6<br>±9.9    | mAGE,<br>mFSIQ,<br>mNVIQ,<br>mVIQ          | N-back face<br>recognition       | Fixation | Block | 1   | 3.125 x<br>3.125 x<br>5<br>(1mm<br>gap) | ns  | ns                                                                                      | ns                                                                                       | LP               | ns       | no | aCOMB | rad= 4-<br>10mm | 13 ROIs<br>aCOMB           | no  | SSL: Corr;<br>GL: t-tests<br>used to<br>compare z'<br>values<br>between ROI<br>pairs                         | yes | ns   | bilateral fronto-<br>parietal                                                                      | None                                     |
| Lee et al.,<br>2009                     | 12 (3F;<br>1LH, 2<br>un-<br>known) | 10.17<br>±1.57 | FSIQ:<br>113.33<br>±17.33                                                                                        | ADOS, ADI-<br>R, DSM-IV                                    | 12<br>(4F;1<br>un-<br>known) | 11.01<br>±1.78 | FSIQ:<br>114.92<br>±10.28                                                      | mAGE,<br>mFSIQ,<br>mGEN                    | Go/No-go                         | Go       | Block | 2.5 | 4 x 4 x<br>3.7                          | 120 | ns                                                                                      | ns                                                                                       | HP (.01<br>Hz)   | ns       | no | aCOMB | rad= 4-<br>12mm | 10 ROIs<br>aCOMB           | no  | SSL: Corr;<br>GL: Mixed<br>ANCOVA                                                                            | yes | no   | R IFG <=> all<br>other ROIs<br>(marginal with<br>age as covariate)                                 | None                                     |

|                        |              |             |                                                               |                                      |              |             |                                                              |                                       |                                                                           |                                 |               |     |                   |      |                                                               |     |             |     |                               |             |             |               |     |                                                                                      |     |    |                                                            |                                                                           |
|------------------------|--------------|-------------|---------------------------------------------------------------|--------------------------------------|--------------|-------------|--------------------------------------------------------------|---------------------------------------|---------------------------------------------------------------------------|---------------------------------|---------------|-----|-------------------|------|---------------------------------------------------------------|-----|-------------|-----|-------------------------------|-------------|-------------|---------------|-----|--------------------------------------------------------------------------------------|-----|----|------------------------------------------------------------|---------------------------------------------------------------------------|
| Lombardo et al., 2010  | 29           | 26.59 ±7.04 | FSIQ: 114.14 ±16.43; VIQ: 112.93 ±15.56; NVIQ: 112.31 ±16.90  | ADOS, ADI-R, ASQ, ICD-10; ASP        | 33           | 27.97 ±6.10 | FSIQ: 116.27 ±11.63; VIQ: 110.79 ±12.03; NVIQ: 118.52 ±11.37 | mAGE, mFSIQ, mNVIQ, mVIQ              | Mentalizing/ Physical judgment about self or a familiar non-close "other" | Fixation                        | Block         | 2   | 3.75 x 3.75 x 3   | 320  | ns                                                            | ns  | HP (.01 Hz) | GIS | no                            | aTD (litTD) | ns          | no            | yes | SSL: PPI; GL: 2nd-level random effects group analysis                                | ns  | ns | Frontal operculum, S1 for Self>Other                       | None                                                                      |
| Mason et al., 2008     | 18 (1F; 3LH) | 26.5        | FSIQ: 101.9; VIQ: 99.2; NVIQ: 104.3                           | ADOS-G, ADI-R, HFA                   | 18 (2F)      | 27.4        | FSIQ: 105.5; VIQ: 103.3; NVIQ: 106.3                         | mAGE, mFSIQ, mGEN, mVIQ, mNVIQ        | Reading comprehension (physical, intentional, emotional)                  | Fixation                        | Block         | 1   | 3.125 x 3.125 x 5 | 1230 | ns                                                            | ns  | HP          | ns  | no                            | aCOMB       | rad= 5-10mm | 11 ROIs aCOMB | no  | SSL: Corr; GL: Two-sample t-test, one-tailed                                         | yes | ns | W/I TOM network; between language and TOM regions          | None                                                                      |
| Mizuno et al., 2006    | 8 (3LH)      | 28.4        | FSIQ > 70; NVIQ: 92.3 (80-112)                                | ADOS, ADI, CARS                      | 8 (3LH)      | 28.1        | ns                                                           | mAGE, mGEN, mHAND                     | Visuomotor (finger tapping irregular sequence)                            | Repetitive index finger tapping | Block         | 2.5 | 3.75 x 3.75 x 8   | 95   | no group difference                                           | yes | LP (.1Hz)   | ns  | yes, 1 regr                   | anat        | ns          | no            | yes | SSL: Regression (covariance); GL: t-tests                                            | no  | ns | Few clusters, mostly SFG, medial temporal lobe             | Many clusters, mostly in bilateral frontal, pericentral, parietal regions |
| Monk et al., 2009      | 12 (1F)      | 26 ±5.93    | VIQ: 117 ±13.67; NVIQ: 119 ±13.68                             | ADOS, ADI-R; 7 AUT, 2 ASP, 3 PDD-NOS | 12 (2F; 1LH) | 27 ±6.1     | VIQ: 110 ±18; NVIQ: 118 ±13.41                               | mAGE, mGEN, mHAND, mNVIQ              | n/a: Rest                                                                 | n/a                             | n/a           | 2   | 3.44 x 3.44 x 3   | 300  | no greater than 3mm in x, y, z direction; no group difference | ns  | LP (.08Hz)  | ns  | no                            | aTD (litTD) | 4 µl        | no            | yes | SSL: Corr; GL: t-test on Z-scores; post-hoc: ANCOVA w/ symptom severity              | ns  | ns | PCG <=> R SFG                                              | PCC with R temporal lobe (middle); R PHG                                  |
| Mostofsky et al., 2009 | 13           | 10.9 ±1.5   | FSIQ: 103 ±18; NVIQ: 106 ±18                                  | ADOS, ADI                            | 13           | 10.5 ±1.4   | FSIQ: 118 ±14; NVIQ: 120 ±19                                 | mAGE, mGEN                            | Finger sequence tapping                                                   | Rest                            | Block         | 3   | 3.59 x 3.59 x 5.5 | 130  | ns                                                            | yes | HP (.01 Hz) | ns  | no                            | aCOMB       | ns          | 7 ROIs aCOMB  | no  | SSL: Partial correlations; GL: MANOVA for "circuits", ANOVA for individual ROI pairs | yes | ns | Motor circuit, all ROI pairs except for L and R cerebellum | None                                                                      |
| Noonan et al., 2009    | 10           | 23.0 ±9.9   | FSIQ: 96.7 (65-114); VIQ: 93.7 (63-116); NVIQ: 100.9 (72-117) | ADOS, ADI; 6 AUT, 4 ASP              | 10           | 25.8 ±9.9   | FSIQ: 110 ±15.8; VIQ: 109.2 ±15.1; NVIQ: 108.5 ±12.8         | mAGE, mFSIQ, mGEN, mHAND, mNVIQ, mVIQ | Source memory                                                             | Jittered Null                   | Event-related | 2.6 | 4 x 4 x 4         | 564  | ns                                                            | yes | LP (.1Hz)   | ns  | yes (number of task regrs ns) | aCOMB       | rad= 3.5mm  | 7 ROIs aCOMB  | yes | SSL: Multiple regression; GL: t-test                                                 | yes | ns | None                                                       | Several clusters for each seed                                            |

|                         |              |           |                                                           |                                              |               |           |                                                           |                         |                                                           |                                 |               |     |                 |      |                                             |     |            |    |                             |              |           |                         |                                 |                                                                                                                             |     |      |                                                                                                         |                                                         |
|-------------------------|--------------|-----------|-----------------------------------------------------------|----------------------------------------------|---------------|-----------|-----------------------------------------------------------|-------------------------|-----------------------------------------------------------|---------------------------------|---------------|-----|-----------------|------|---------------------------------------------|-----|------------|----|-----------------------------|--------------|-----------|-------------------------|---------------------------------|-----------------------------------------------------------------------------------------------------------------------------|-----|------|---------------------------------------------------------------------------------------------------------|---------------------------------------------------------|
| Shih et al., 2010       | 14           | 24.1 ±9.5 | FSIQ: 99 ±11.7; VIQ: 93 ±15.5; NVIQ: 107 ±13.9            | ADOS, ADI-R; 8 AUT, 3 ASP, 3 PDD-NOS         | 14            | 24.2 ±8.4 | FSIQ: 114 ±12.1; VIQ: 110 ±10.8; NVIQ: 114 ±11.9          | mAGE, mNVIQ, mGEN       | Semantic decision                                         | Letter detection                | Block         | 2.6 | 4 x 4 x 5       | 218  | ns                                          | yes | LP (.1Hz)  | ns | yes (1 for each trial type) | litTD + anat | rad= 4mm  | no                      | yes                             | SSL: Covariance and SEM; GL: t-tests on fit coefficients                                                                    | no  | Incl | None                                                                                                    | dorsal PFC, L ACG                                       |
| Solomon et al., 2009    | 22           | 15.2      | FSIQ: 107 (85-132); VIQ: 107 (80-145); NVIQ: 105 (77-135) | ADOS, SCQ; 10 AUT, 12 ASP                    | 23            | 16        | FSIQ: 113 (83-131); VIQ: 114 (86-136); NVIQ: 111 (83-130) | mAGE, mGEN, mIQ         | Cognitive control (Preparing to overcome prepotency task) | Fixation                        | Event-related | 2   | 4 x 3.4 x 3.4   | ~948 | ns                                          | yes | HP (.01Hz) | ns | no                          | aTD          | rad= 10mm | CG, parietal, occipital | no                              | SSL: Corr; GL: t-tests                                                                                                      | yes | ns   | R BA10, L BA17 and BA18; L BA10 and L Parietal, Posterior and Dorsal ACG; L BA9 and PCG, L BA7 and BA18 | None                                                    |
| Turner et al., 2006     | 8 (3LH)      | 28.1 ±8.3 | FSIQ > 70; NVIQ: 92.3 (80-112)                            | ADI, CARS                                    | 8 (3LH)       | 28.6 ±7.2 | ns                                                        | mAGE, mGEN, mHAND       | Visuomotor (finger tapping irregular sequence)            | Repetitive index finger tapping | Block         | 2.5 | 3.75 x 3.75 x 7 | 98   | ns                                          | yes | LP (.1Hz)  | ns | yes, 1 regr                 | anat         | ns        | no                      | yes                             | SSL: Multiple regression; GL: t-tests on fit coefficients                                                                   | no  | ns   | Few clusters R SFG, bilateral temporo-occipital                                                         | Many frontal, paracentral, parietal, occipital clusters |
| Villalobos et al., 2005 | 8 (3LH)      | 28.1 ±8.3 | FSIQ > 70; NVIQ: 92.3 (80-112)                            | ADI, CARS                                    | 8 (3LH)       | 28.6 ±7.2 | ns                                                        | mAGE, mGEN, mHAND       | Visuomotor (finger tapping irregular sequence)            | Repetitive index finger tapping | Block         | 2.5 | 3.75 x 3.75 x 7 | 95   | ns                                          | yes | ns         | ns | yes, 1 regr                 | anat         | ns        | no                      | yes                             | SSL: Covariance; GL: t-tests on fit coefficients                                                                            | ns  | ns   | IFG, R SGg, paracentral lobule; Thal (Pulvinar), R BG (Putamen), Cerebellar vermis                      | None                                                    |
| Welchew et al., 2005    | 13           | 31.2 ±9.1 | FSIQ: 108.6 ±17.1                                         | DSM-IV, AQ; HFA, ASP                         | 13            | 25.6 ±5.1 | FSIQ: 117.9 ±9.6                                          | mAGE, mFSIQ, mHAND      | Emotional face perception                                 | Scrambled face                  | Block         | 3   | 1.95 x 1.95 x 4 | 160  | ns                                          | ns  | ns         | ns | no                          | anat         | ns        | 90 ROIs anat            | yes (ROIs covering whole brain) | SSL: Corr-matrix to difference matrix (1-r); GL: 3-way multidim scaling within; btwn grp test performed w/ permutation test | no  | ns   | Medial temporal lobe                                                                                    | Many ROI pairs (incl. fronto-occipital)                 |
| Weng et al., 2010       | 16 (2F; 1LH) | 15 ±1.45  | VIQ: 114 ±18.58; NVIQ: 117 ±13.82                         | ADOS, ADI-R, DSM-IV; 6 AUT, 2 ASP, 8 PDD-NOS | 15 (1F; 2 LH) | 16 ±1.44  | VIQ: 113 ±14.10; NVIQ: 106 ±12.53                         | mAGE, mGEN, mHAND, mVIQ | n/a: Rest                                                 | n/a                             | n/a           | 2   | 3.44 x 3.44 x 3 | 300  | no greater than 3.44mm in x, y, z direction | yes | LP (.08Hz) | ns | no                          | anat (litTD) | 4 µl      | no                      | yes                             | SSL: Corr; GL: t-test, ANCOVA w/ symptom severity                                                                           | ns  | ns   | PCG <=> 9/11 areas in DMN                                                                               | None                                                    |

|                                                                                                                                                                                                                                                                                                                                                                                                                                                                                                                                                                                                                                                                                                                                                                                                                                                    |         |        |                                                  |                  |    |          |    |                    |                                                                   |             |       |   |             |          |    |    |    |    |    |     |              |                     |    |                                    |    |            |                                                                 |
|----------------------------------------------------------------------------------------------------------------------------------------------------------------------------------------------------------------------------------------------------------------------------------------------------------------------------------------------------------------------------------------------------------------------------------------------------------------------------------------------------------------------------------------------------------------------------------------------------------------------------------------------------------------------------------------------------------------------------------------------------------------------------------------------------------------------------------------------------|---------|--------|--------------------------------------------------|------------------|----|----------|----|--------------------|-------------------------------------------------------------------|-------------|-------|---|-------------|----------|----|----|----|----|----|-----|--------------|---------------------|----|------------------------------------|----|------------|-----------------------------------------------------------------|
| Wicker et al., 2008                                                                                                                                                                                                                                                                                                                                                                                                                                                                                                                                                                                                                                                                                                                                                                                                                                | 12 (1F) | 27 ±11 | FSIQ: 82 ±19.70; VIQ: 83 ±20.24; NVIQ: 82 ±19.58 | DSM-IV; AUT, ASP | 14 | 23.4 ±10 | ns | mAGE, mHAND, mTASK | Identifying emotion or age while actors gaze is direct or averted | Pooled Gaze | Block | 3 | 3 x 3 x 3.5 | 39/block | ns | ns | ns | ns | no | aTD | 47-387 $\mu$ | 7 ROIs, litTD & aTD | no | SSL: SEM; GL: t-test on path coefs | no | Obs & Incl | AMY => DMPFC DLTPFC => FG => DLPFC => VLPFC => STS; V1/V2 => FG |
| Notes and Abbreviations:                                                                                                                                                                                                                                                                                                                                                                                                                                                                                                                                                                                                                                                                                                                                                                                                                           |         |        |                                                  |                  |    |          |    |                    |                                                                   |             |       |   |             |          |    |    |    |    |    |     |              |                     |    |                                    |    |            |                                                                 |
| General abbreviations (used through-out): ns, not stated; SD, standard deviation; n/a, not applicable; p(s), participant(s)                                                                                                                                                                                                                                                                                                                                                                                                                                                                                                                                                                                                                                                                                                                        |         |        |                                                  |                  |    |          |    |                    |                                                                   |             |       |   |             |          |    |    |    |    |    |     |              |                     |    |                                    |    |            |                                                                 |
| F, female; LH, left-handed                                                                                                                                                                                                                                                                                                                                                                                                                                                                                                                                                                                                                                                                                                                                                                                                                         |         |        |                                                  |                  |    |          |    |                    |                                                                   |             |       |   |             |          |    |    |    |    |    |     |              |                     |    |                                    |    |            |                                                                 |
| Mean, SD (or range, if SD ns)                                                                                                                                                                                                                                                                                                                                                                                                                                                                                                                                                                                                                                                                                                                                                                                                                      |         |        |                                                  |                  |    |          |    |                    |                                                                   |             |       |   |             |          |    |    |    |    |    |     |              |                     |    |                                    |    |            |                                                                 |
| Mean, SD; FSIQ, Full Scale IQ; VIQ, Verbal IQ; NVIQ, Nonverbal IQ                                                                                                                                                                                                                                                                                                                                                                                                                                                                                                                                                                                                                                                                                                                                                                                  |         |        |                                                  |                  |    |          |    |                    |                                                                   |             |       |   |             |          |    |    |    |    |    |     |              |                     |    |                                    |    |            |                                                                 |
| Tools: ADOS, ADI, ASQ, CARS, DSM-IV, ICD-10, see Methods; Diagnosis: AUT, Autistic disorder; HFA, High-functioning autism; ASP, Asperger's disorder; PDD-NOS, Pervasive developmental disorder, not otherwise specified                                                                                                                                                                                                                                                                                                                                                                                                                                                                                                                                                                                                                            |         |        |                                                  |                  |    |          |    |                    |                                                                   |             |       |   |             |          |    |    |    |    |    |     |              |                     |    |                                    |    |            |                                                                 |
| F, female; LH, left-handed                                                                                                                                                                                                                                                                                                                                                                                                                                                                                                                                                                                                                                                                                                                                                                                                                         |         |        |                                                  |                  |    |          |    |                    |                                                                   |             |       |   |             |          |    |    |    |    |    |     |              |                     |    |                                    |    |            |                                                                 |
| Mean, SD (or range, if SD ns)                                                                                                                                                                                                                                                                                                                                                                                                                                                                                                                                                                                                                                                                                                                                                                                                                      |         |        |                                                  |                  |    |          |    |                    |                                                                   |             |       |   |             |          |    |    |    |    |    |     |              |                     |    |                                    |    |            |                                                                 |
| Mean, SD; FSIQ, Full Scale IQ; VIQ, Verbal IQ; NVIQ, Nonverbal IQ                                                                                                                                                                                                                                                                                                                                                                                                                                                                                                                                                                                                                                                                                                                                                                                  |         |        |                                                  |                  |    |          |    |                    |                                                                   |             |       |   |             |          |    |    |    |    |    |     |              |                     |    |                                    |    |            |                                                                 |
| Matching for: mAGE (age); mFSIQ (full scale IQ); mGEN (gender); mHAND (handedness); mIQ (IQ); mNVIQ (nonverbal IQ); mRACE (race); mSES (socioeconomic status); mTASK (task performance); mVIQ (verbal IQ)                                                                                                                                                                                                                                                                                                                                                                                                                                                                                                                                                                                                                                          |         |        |                                                  |                  |    |          |    |                    |                                                                   |             |       |   |             |          |    |    |    |    |    |     |              |                     |    |                                    |    |            |                                                                 |
| TOL, Tower of London; TOM, Theory of Mind                                                                                                                                                                                                                                                                                                                                                                                                                                                                                                                                                                                                                                                                                                                                                                                                          |         |        |                                                  |                  |    |          |    |                    |                                                                   |             |       |   |             |          |    |    |    |    |    |     |              |                     |    |                                    |    |            |                                                                 |
| Excludes time points discarded at the beginning of each run, if clearly stated                                                                                                                                                                                                                                                                                                                                                                                                                                                                                                                                                                                                                                                                                                                                                                     |         |        |                                                  |                  |    |          |    |                    |                                                                   |             |       |   |             |          |    |    |    |    |    |     |              |                     |    |                                    |    |            |                                                                 |
| TP, time point; SSD, sum of squares of derivatives                                                                                                                                                                                                                                                                                                                                                                                                                                                                                                                                                                                                                                                                                                                                                                                                 |         |        |                                                  |                  |    |          |    |                    |                                                                   |             |       |   |             |          |    |    |    |    |    |     |              |                     |    |                                    |    |            |                                                                 |
| LP, Low-pass; HP, High-pass                                                                                                                                                                                                                                                                                                                                                                                                                                                                                                                                                                                                                                                                                                                                                                                                                        |         |        |                                                  |                  |    |          |    |                    |                                                                   |             |       |   |             |          |    |    |    |    |    |     |              |                     |    |                                    |    |            |                                                                 |
| GIS, Global intensity scaling                                                                                                                                                                                                                                                                                                                                                                                                                                                                                                                                                                                                                                                                                                                                                                                                                      |         |        |                                                  |                  |    |          |    |                    |                                                                   |             |       |   |             |          |    |    |    |    |    |     |              |                     |    |                                    |    |            |                                                                 |
| regr, regressor                                                                                                                                                                                                                                                                                                                                                                                                                                                                                                                                                                                                                                                                                                                                                                                                                                    |         |        |                                                  |                  |    |          |    |                    |                                                                   |             |       |   |             |          |    |    |    |    |    |     |              |                     |    |                                    |    |            |                                                                 |
| aTD, activation from TD group; aCOMB, from both groups; litTD, activation from TD literature; anat, from anatomy                                                                                                                                                                                                                                                                                                                                                                                                                                                                                                                                                                                                                                                                                                                                   |         |        |                                                  |                  |    |          |    |                    |                                                                   |             |       |   |             |          |    |    |    |    |    |     |              |                     |    |                                    |    |            |                                                                 |
| rad, radius                                                                                                                                                                                                                                                                                                                                                                                                                                                                                                                                                                                                                                                                                                                                                                                                                                        |         |        |                                                  |                  |    |          |    |                    |                                                                   |             |       |   |             |          |    |    |    |    |    |     |              |                     |    |                                    |    |            |                                                                 |
| FFA, Fusiform Face Area; PHG, Parahippocampal Gyrus; FG, Fusiform Gyrus; LH, Left hemisphere; V1, Primary visual cortex; TNN, Task-negative network; TPN, Task-positive network; TOM, of Mind; CG, Cingulate gyrus                                                                                                                                                                                                                                                                                                                                                                                                                                                                                                                                                                                                                                 |         |        |                                                  |                  |    |          |    |                    |                                                                   |             |       |   |             |          |    |    |    |    |    |     |              |                     |    |                                    |    |            |                                                                 |
| fc, functional connectivity                                                                                                                                                                                                                                                                                                                                                                                                                                                                                                                                                                                                                                                                                                                                                                                                                        |         |        |                                                  |                  |    |          |    |                    |                                                                   |             |       |   |             |          |    |    |    |    |    |     |              |                     |    |                                    |    |            |                                                                 |
| SSL, single subject level; GL, group level; DCM, dynamic causal modeling; Corr, correlation; SEM, structural equation modelling; PPI, Psychophysiological Interactions                                                                                                                                                                                                                                                                                                                                                                                                                                                                                                                                                                                                                                                                             |         |        |                                                  |                  |    |          |    |                    |                                                                   |             |       |   |             |          |    |    |    |    |    |     |              |                     |    |                                    |    |            |                                                                 |
| Obs, Observed; Incl, Included                                                                                                                                                                                                                                                                                                                                                                                                                                                                                                                                                                                                                                                                                                                                                                                                                      |         |        |                                                  |                  |    |          |    |                    |                                                                   |             |       |   |             |          |    |    |    |    |    |     |              |                     |    |                                    |    |            |                                                                 |
| L, Left; R, Right; dACC, dorsal anterior cingulate cortex; FEF, frontal eye fields; ACCg, anterior cingulate gyrus; V1, primary visual cortex; DMN, default mode network; CG, cingulate gyrus; INS, insula; IFG, inferior frontal gyrus; IPL, inferior parietal lobule; TOM, theory of mind; TNN, task-negative network; MPFC, medial prefrontal cortex; AG, angular gyrus; PCG, posterior cingulate gyrus; Cu, cuneus; AMY, amygdala; Thal, thalamus; DLPFC, dorsolateral prefrontal cortex; postPreCS, posterior precentral sulcus; IPS, intraparietal sulcus; SPL, superior parietal lobe; supParaCing, superior paracingulate gyrus; SFG, superior frontal gyrus; BG, basal ganglia; MFG, middle frontal gyrus; DMPFC, dorsomedial prefrontal cortex; VMPFC, ventromedial prefrontal cortex; STS, superior temporal sulcus; FG, fusiform gyrus |         |        |                                                  |                  |    |          |    |                    |                                                                   |             |       |   |             |          |    |    |    |    |    |     |              |                     |    |                                    |    |            |                                                                 |

Note: This table is formatted for legal paper
